# Supplementary material
Source: Research Square preprint supplement (doi:10.21203/rs.3.rs-8837280/v1)
Supplement: Supplementary file 1 [file 6b4422c6fd5f0ce2e2646ddc.docx]

| **Probing Questions** | **Main Questions** |
| --- | --- |
| Please give an example..  Please explain... | 1. Describe your experiences since the birth of your child.  2.What was your professional situation?.  3.Who helped you?  4.How was your emotional situation?  5. What were your concerns?  6. What guidelines and policies were in place to facilitate your role as a mother?  7.What is it like to live with this role?  8.Tell me about a day in your life?  9.What experiences do you have with the role of a faculty member on maternal role?  10. What problems did you have? |
